# Supplementary material for: Targeted Downregulation of s36 Protein Unearths its Cardinal Role in Chorion Biogenesis and Architecture during Drosophila melanogaster Oogenesis
Source: PubMed Central journal article supplement (PMC5067561; doi:10.1038/srep35511), 2016-10-18
Supplement: srep35511-s1.pdf [file srep35511-s1.pdf]

**Targeted Downregulation of s36 Protein Unearths its Cardinal Role  
in Chorion Biogenesis and Architecture during *Drosophila*  
*melanogaster* Oogenesis**

**Athanassios D. Velentzas<sup>1</sup>, Panagiotis D. Velentzas<sup>1,2</sup>, Niki E. Sagioglou<sup>1</sup>,  
Eumorphia G. Konstantakou<sup>1,3</sup>, Athanasios K. Anagnostopoulos<sup>4</sup>, Maria M.  
Tsioka<sup>1</sup>, Vassiliki E. Mpakou<sup>1</sup>, Zoe Kollia<sup>5</sup>, Christos Consoulas<sup>6</sup>, Lukas H.  
Margaritis<sup>1</sup>, Issidora S. Papassideri<sup>1</sup>, George Th. Tsangaris<sup>4</sup>, Evangelia  
Sarantopoulou<sup>5</sup>, Alkiviadis-Constantinos Cefalas<sup>5</sup> and Dimitrios J. Stravopodis<sup>1,\*</sup>**

<sup>1</sup>Section of Cell Biology and Biophysics, Department of Biology, School of Science, National and Kapodistrian University of Athens (NKUA), Athens, Greece

<sup>2</sup>Present Address: Department of Cancer Biology, Medical School, University of Massachusetts, Worcester, Massachusetts (MA), USA

<sup>3</sup>Present Address: Department of Hematology and Medical Oncology, Winship Cancer Institute of Emory, Emory University School of Medicine, Atlanta, Georgia (GA), USA

<sup>4</sup>Proteomics Core Facility, Systems Biology Center, Biomedical Research Foundation of the Academy of Athens (BRFAA), Athens, Greece

<sup>5</sup>Theoretical and Physical Chemistry Institute, National Hellenic Research Foundation (NHRF), Athens, Greece

<sup>6</sup>Laboratory of Experimental Physiology, Medical School, National and Kapodistrian University of Athens (NKUA), Athens, Greece

**\*Corresponding Author:**

Dimitrios J. Stravopodis, *BSc, MSc, PhD*, Assistant Professor, Section of Cell Biology and Biophysics, Department of Biology, School of Science, National and Kapodistrian University of Athens (NKUA), Panepistimiopolis, Zografou 157 84, Athens, Greece (GR). Tel.: +30 210 727 4105, Fax: +30 210 727 4742, E-mail: [dstravop@biol.uoa.gr](mailto:dstravop@biol.uoa.gr), URL: <http://www.biol.uoa.gr>

**Running Title:** Indispensable Contribution of s36 Protein to Chorion Morphogenesis

c355>eGFP,s36\_RNAi

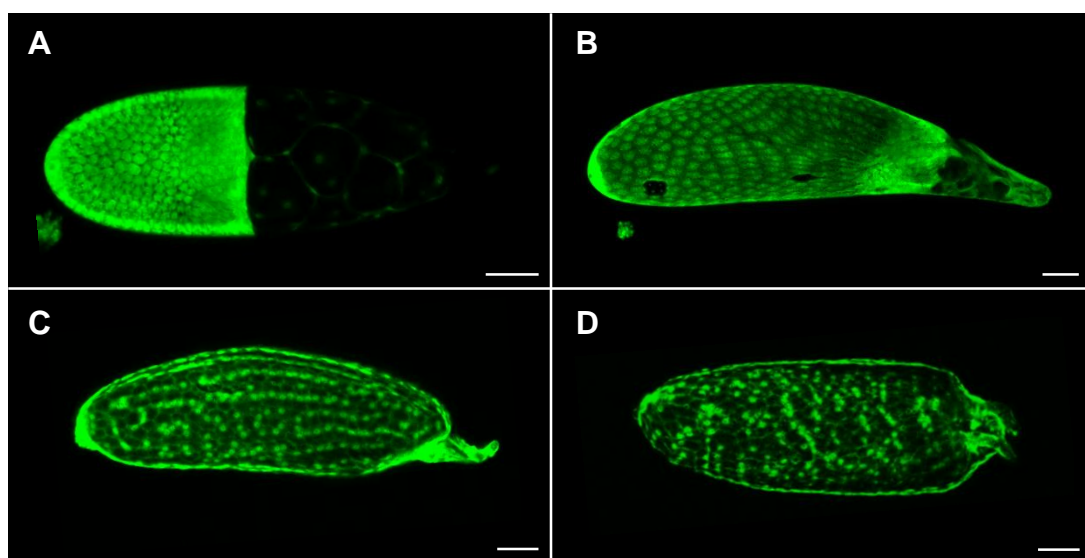

c355>s36\_RNAi

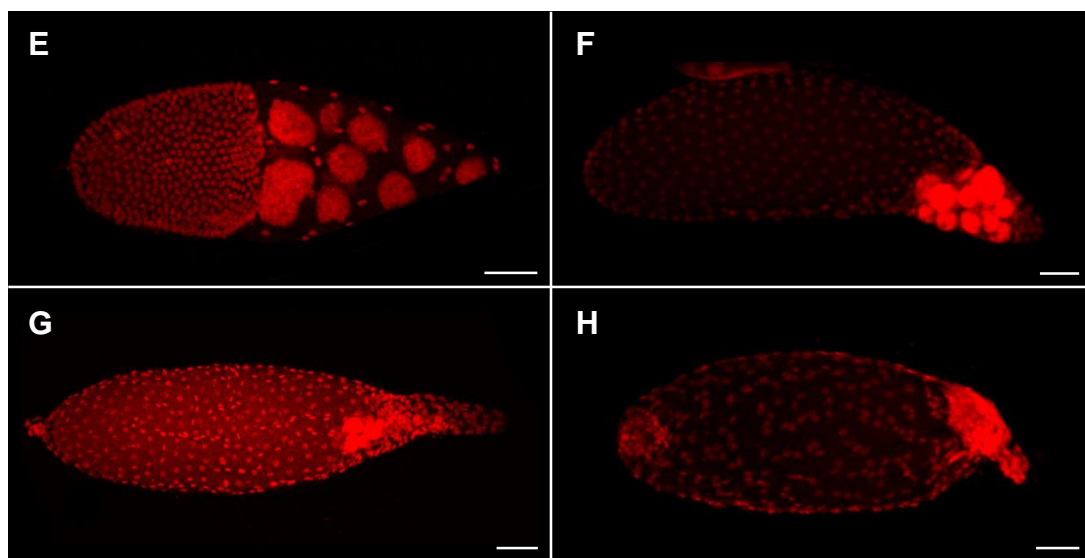

## **Supplementary Figure S1**

**The developmental courses of follicle- and nurse-cell clusters remain unaffected in the absence of s36 chorionic protein.** (A-D) Confocal laser scanning microscopy (CLSM) images of eGFP-protein expression profiling in the s36-depleted follicle-cell cluster of triple transgenic (*c355>eGFP,s36\_RNAi*) ovarian follicles at developmental stage 10 (A), 13 (B) and 14 (C and D). (E-H) CLSM imaging of PI nuclear staining of follicle- and nurse-cell compartments in the s36-targeted follicles (*c355>s36\_RNAi*) at developmental stage 10 (E), 12 (F), 13 (G) and 14 (H). Scale Bars: 50  $\mu\text{m}$ .

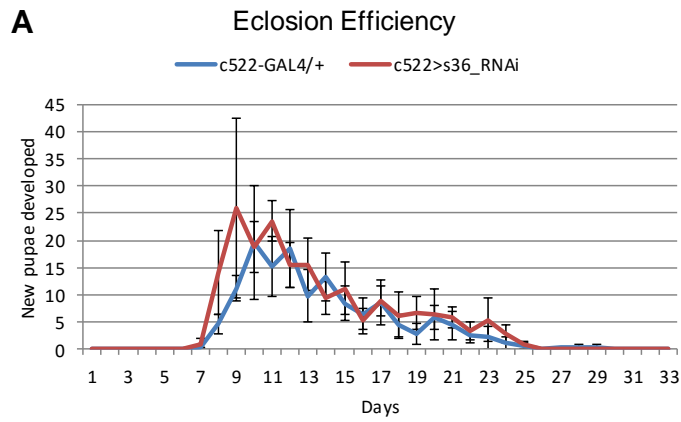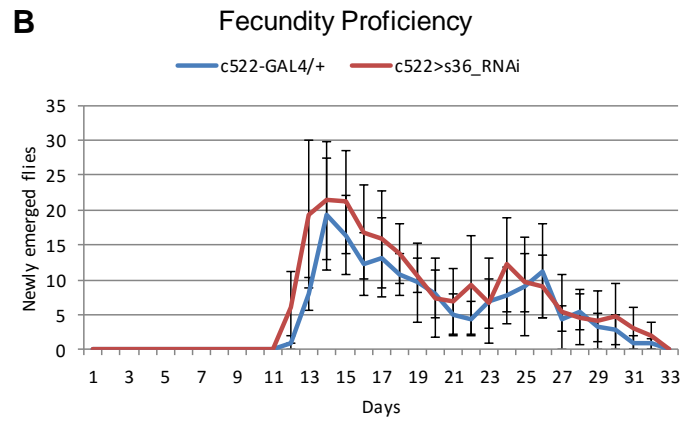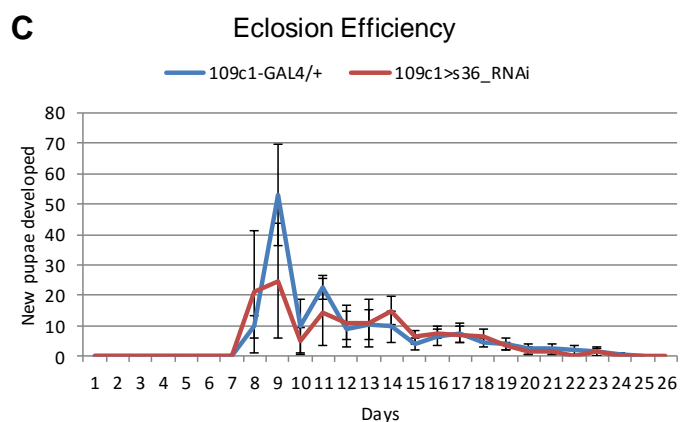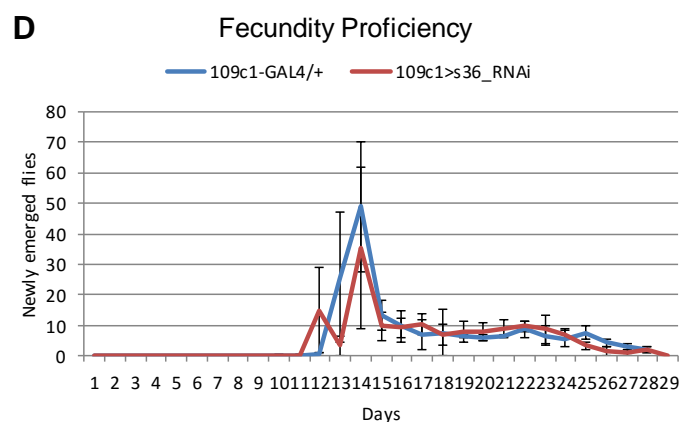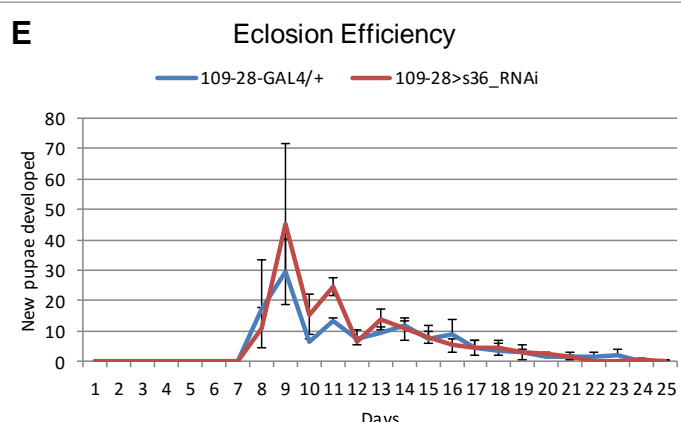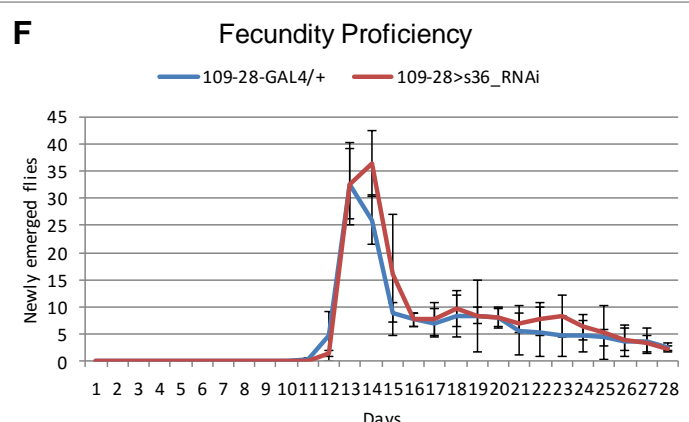

## **Supplementary Figure S2**

### **Genetic targeting of s36 chorionic protein in regionally specialized follicle-cell subpopulations does not harm typical eclosion capacity and fecundity integrity.**

Eclosion-efficiency (A, C and E) and fecundity-proficiency (B, D and F) graphs of flies being targeted for the s36 chorionic protein specifically in follicular border cells (c522>s36\_RNAi) (A and B), (anterior and posterior) polar cells (109c1>s36\_RNAi) (C and D), or follicle cells of dorsal appendages (109-28>s36\_RNAi) (E and F). Note the significant similarities with their respective control (c522-GAL4/+, 109c1-GAL4/+ and 109-28-GAL4/+) fly strains.

| Gene Name                       | Primer Sequence                      | Molecular Size (bp) of PCR Product | Ta   |
|---------------------------------|--------------------------------------|------------------------------------|------|
| Chorion protein 36<br>(CG1478)  | F: 5'-CAA CTC GGT CTC TGG TTT GG-3'  | 195                                | 57°C |
|                                 | R: 5'-CTG TGA GGC GAT CTG ATT GG -3' |                                    |      |
| Chorion protein 38<br>(CG11213) | F: 5'-CGA GAT CGA CCT ACA TTT G-3'   | 213                                | 53°C |
|                                 | R: 5'-ATT CGA GAG CAC CAG CAC C-3'   |                                    |      |
| Chorion protein 18<br>(CG6517)  | F: 5'-GCC AAT GTG GGA TCT CAG TA-3'  | 195                                | 55°C |
|                                 | R: 5'-GCT GTG TCC GTA CTC CTG GT-3'  |                                    |      |
| Chorion protein 16<br>(CG6533)  | F: 5'-AAG CTG GAC GGT GCT GAC T-3'   | 201                                | 53°C |
|                                 | R: 5'-GGT CTT CAG GTA CGC ATT C-3'   |                                    |      |
| Chorion protein 19<br>(CG6524)  | F: 5'-GCT ACA ACG GTG GCA ACT A-3'   | 196                                | 53°C |
|                                 | R: 5'-CCA TAC TGG TTC TCT GGG A-3'   |                                    |      |
| Chorion protein 15<br>(CG6519)  | F: 5'-AGG TTA TGG TGG TGG CTA CG-3'  | 190                                | 55°C |
|                                 | R: 5'-CTT GTA GGT TCC GGG ATT CA-3'  |                                    |      |

## **Supplementary Table S1**

Gene name, oligonucleotide primer sequence (F: forward; R: reverse), molecular size (bp) and annealing temperature (Ta) of the amplified PCR products for the herein examined genes

**Supplementary Table S2 (a separate Microsoft Excel format file)**

Protein library (N = 2,131 members) of s36-depleted fly ovaries (c355>s36\_RNAi) indicating for each identified protein its: (a) UniProt accession number, (b) name and description together with fundamental features of LC-MS/MS proteomics analysis, such as (c) (Mascot) score, (d) sequence coverage, (e) number of unique peptides (n = 17,772 tryptic fragments), (f) number of amino-acid residues (AAs), (g) molecular weight (MW) in kDa and (h) (calculated) isoelectric point (pI)
